# Supplementary material for: A Second Soundly Sleeping Dragon: New Anatomical Details of the Chinese Troodontid Mei long with Implications for Phylogeny and Taphonomy
Source: PLoS One. 2012 Sep 27;7(9):e45203. doi: 10.1371/journal.pone.0045203 (PMC3459897; doi:10.1371/journal.pone.0045203)
Supplement: Analysis S1 — A nexus file containing the matrix used to produce the trees seen in Figures 8 and S1. This file is formatted for use with the program TNT. (NEX) [file pone.0045203.s003.nex]

#NEXUS
begin data;
dimensions ntax=90 nchar=363;
format missing=? symbols="0~4";
matrix
Allosaurus_fragilis ?11000?0000000000010001000100000011101100201?2000000000000010000000000000010000000000101010010000000100100000000001?01000000001????0000000000100010100010100000010000010100000000000000011000000100000000000000000001000000000000000000000000000000000000000000100000000000000000000000000000000000100000000000000000000000000000000000000000000000000000000000000000000000
Sinraptor        ?11000??00?00000001000100010?00000010110020102?00000000000010000?00000000?10?00000000101010010000000100100000000001?0??????????1?00?0?0??00??????????00??10000?0100?001000000001000000001100000010000000000000?100?000?00?000000??0000000000000000000000000000010000000100??00?0???????0?00??00?0????????00???02000000000010?0000000??0?0000000?00??000??001?00000000000000
Dilong_paradoxus ??100?????000???????0010??10100000?0?0101?0??2?000??1??0?0???????000?000??0???00000001010?1???00?0101????0????????1????0?0?0?1?0??????020?10??????0?00000000?1??????0?101?0?1??1?0???0?????0??????????100?0??00??0?0????0?0????0???0?0000000001310000000000?0???110?0001100?0001011?1??00?10000100010000000001?0001010?10110000000000010???0?01?00??0?0?0000100?0???0000000
Eotyrannus_lengi ?????????????????????0?1?????????????0?0?????????????????????????00??0?0????????0000?10??01???00??1?1???????????????????????????????0?0?0?000????????000???????????????????????????????????????0???00????????????0?0????00??????00???00??00?00??11??0?0?????01?111?00?0?????00????11?0??0??1?0?0??0?0??0?00????????????????????????????1??????1??000??0?00?0???00??????????
Tyrannosaurus_rex ?10000?00?00000002100001101010000000001012010211000010010001?000000000000010010000000101011010000000100101000000101?00000000??1????0000000010100??0?0100010010001000001011011010000000001000010001000002000000010000000000000010001000000000001011000000000001011000000000000101000000?001110001000?0?00?0????01001001010110?0000000???000100000000000010000100000000100000
Gorgosaurus_libratus ?10000?00?000?0???10000110111000000001101201?21100?010010001????00000000001001000000010101101000000??00101000000101?00000000001????00000000101000001010001001000100000101100101000000000100001000100000200000001000000000000?0100010000000000010110000000000010110000000000001110000000?01100101000?0?000000??0100100101011000000000???000100010000000010000100000000100000
Tanycolagreus_topwilsoni ??00?????????????????0?0??????0????00000??????????0?00???????????????????????00000?????1??0???????????010000????????0??0????????????000000000100??0100010???????????????1??????10000000010000000010000000?00000??0????1??000????00????????0?0???00??0?0?????????1??????110??0010011110000111000100010001000001?????010010110000000000011??1?0?1??00000?00??0?000?????0?????
Coelurus_fragilis ??????????????????????????????????????????????????????????????????2??000????????????0????1????0000100?010000?????????002????????????0?0??0?00100??01?0??????????????????1?????1100000000100?0000?1000?0??????00??0????0?0??0???000??????????????????????????00???????10110??00???111100??1?1????0001000????????????010?101?0??????????11??1?0?1???00??00??????00????000?000
Ornitholestes_hermanni ?0110???0?0?00?1???0?010?011100001?000000?00?100000001?01011?????00000000000?000000?0101000???00011?110110000??100??0010??1????????????????0?000??????00010001??010?0010?000101?10000001??0????????00000????00000?0010?00?0?00?00010000100010010?01??1000?100?000?00001110???????11010?0????????0?????000100??010010?0?101?0???????0????000000100000??0??1101??000000000000
Compsognathus_longipes ?0110?????????????????1???1??0?????00000???0?01???????00?????????0000010??0???0?0001010101000?010?10?0???0?0?????01??0?2000001??????0?000?00?10???0???0???0?????????00100?100?01?0?????????00?0???000000000001100?00????0?0????0???0000000011010?0100100001?00??0?0?0001100?0001010010????????????????0?0?10??0100101??1011000000000??0?00?00010?000000??1110?000??00000000
Huaxiagnathus_orientalis ?01?0??????????????0001???1??0?0?????00??0?0?????????????????????00?0010??????0?000101010?00??0???1????????0??????1????2?000010????000000000?10??1010000000020?0??1000100?000001?0??0???0??0??0?01000000000?011??000????00?0???0???0000000011010?0100100001?0???1?0?00011?0?0000010010000?00000100010?0000000?0100101??10110000000?0001000?00010000000000?10000?0????000000
Sinosauropteryx_prima ?01?0??????????????0001???1??0?0?????0000??0???00??010???????????000?01?0?????0?000101010?00??01??100????0?0?0????1??11200000100????00000?00?10??1010001000020??????00100?100?01?0??00?00?000?0?01000000000?011??0000?000000???0???000000001101000100100001?0???0?0?0001101?0001000000000?0000010001000000100001001010?1?110000000000?10000??010000000001110000?0???0000000
Deinocheirus_mirificus ??????????????????????????????????????????????????????????????????????????????????????????????????????????????????????????????????????1?00000100??0?10000????????????????????????????????????????????????????????0???????0?0????0????????????????????????????????????????????0?0??10?0??1100000100000000000001??????????????????????1100??????????00???11??1?0?????????????
Harpymimus_okladnikovi ?011???????????????21000????000??????0000??00????????????????????020000?0000????1?122????0?0???00?110001?00001?10000?00000?1????????0?0?0?00010010010020010??00011???0???????????00??????????????00000010??0000?10110???1?00???000?1?2011001101?00100?00101?00?0???0000110??00?0??10?00001000001000000000010020????0????01?0???00000010000?00?1?0000?0000??110?00?0?0000???
Pelecanimimus_polyodon ?01???1???1????1?2?21000??10010?????02000?00???????1????000??????000?0000?00??0?00021??0001???10011?00????0????????????????????0100???02???2?10??00110200?????????????????????????????????????????????????????001010????1?1????0???1?10?1001100200100100101?0??00?010001????????0?10?00?1100011100001000012002??????????????????????1100???0?0????????011111?0??0?000??0???
Shenzhousaurus_orientalis ???????????????????210001?10??0??1???000??00?000?00????????????0?00000000??0??0?1?122??1????????????0????0???0???00000???0???????????????????????????020010000??110?00100?000000100?00001?0??????????????????0??1??1?0011??????0??01020?100??0?100?00?00????0???????0??1100????????????0??0??0?10?0010?0010?0200?0?0?0??????????????100?0??0?0?00?????0???11?0??0?0???00000
Archaeornithomimus_asiaticus ???????????????????????????????????????????????????????????????????????????????????????????????000110001000001?100000000?0??????????010201?20100??0?10100???000?1100011001?00?00100000001?00010001000001?3?0000??01??10??1?1????000???????????????????????????????????1110??00??0?10?0??110?0001000?1??001200??00010100?11?0??????????0000?000100?00???11??1?001????010?000
Garudimimus_brevipes ?0110????01101????021001101001000??002000000000010?1??0?0001??1??0000000000020001?1?3???????01100???000??0?001??0????????????????????????????????????????10000001100??????????00?000000010000?0001000001??0000?01??1110??11?0010????0??1100110120010010010100000?????11110????????????????????????????????????0????010110110010???00??????000?1000??000???1????000000000000
Anserimimus_planinychus ????????????????????????????????????????????????????????????????????????????????????????????????????????0?????????????????0??????????1???1?2????000110100??????????????????????????????????????????00002?3?00????11??10??1?1???????????????????????????????????????????????????1???0??0?1?00011100010000022001???????????1?0?????????100??????2???00???11??1?0???????1?????
Ornithomimus_edmontonicus ?01110?110?101?101021001101?0100211000000000000000010000000??????00000000010??001?1?3??????001?0011000010000010100000000?001001?????011201020100000?101001000000110001100100000010000000110001000100000203?0000111111101?11100?000??0??11011101200100100101?0?0??????1?1100?0011011010?01?0001110001100002200200001010?111?0???10000110000?000200000?0011?11100??0000100000
Struthiomimus_altus ?01110?110??0??101021001101?010021100000000000000001?0000001?01??0000000001020001?1?3??????001?10110000100000101000000000001001?????0112010201000001101001000000110001100100000000000000110001000100000203?0000111111101?111001000??0??1100110120010010010100?10?????1111000001001101000110000110000100001100200001010?11110???10000110000?000200000?0011?1110010?000100???
Gallimimus_bullatus ?01110?11011010101021001101?01002110000000000000000100000001?01010000000001020001?1?3??????0011001100001000001?100000000000100??????0112010201000?01101001000000110001100100000010000000110001000100000203?0000011111101?1110010000?0??1100110120010010010100000?????111100?00?0011010001100000100001000011002000010101111?0???100001100000000200000?0011?11100100000100000
Falcarius_utahensis ?01??01000??01?0121??????0???1????????????00??????0?1?00000???????0??000??????????00110000????10?01101?101?000?110011102?011?????????00?100011011?0000000100?11001010220001?10101000000010001001010000000?00000??0???10?00?0?0111111111????????????????????00?????0001?11???0?????11?01?0111000100010000000100021?101????0?0?0?00?000010???000000000000?0??0?0???????00?000
Beipiaosaurus_inexpectus ??????????????????????????????????????????????????????????????????2??1?????????????0100001????????1?????????????????????1??????????0???0?????????00?0000?100????????????????????????00?0????10??0?000?????0?????????????0??????111???1????0?????????????????00?????????????0????0????0100?1100010?010?0?100?0?1?????11?0????0?1?????0?00????????1???0?0?0??0?0???????00?000
Alxasaurus_elesitaiensis ?????????????????????????????????????????????????????????????????220?100???????????0100001??????????0?01?00000?1?001??02?0?1??????????????000?0?10000000010021?00??100210?0?1?2?????0?????00????????000002?0000??0???1??00?0???11??1111?????????????????????00???0?011111??????0?100101?011??00?1??????11001??1?001???00???????00000??0?1??000?010001?0????000????????0?000
Nothronychus_mckinleyi ?????010?????????20???????????????????????????????????00100???????????????????????001000??????00001101??100001??????1???1???????????0?0????01100????????????????????0021?0?110?????????0???010???????0???????????0??????0?????0?1111?1???????????????????????????0???101?0???0?0??00?????????????????????000????001?0??????????????1????11???1????00???????0????????0??????
Erliansaurus_bellamanus ?????????????????????????????????????????????????????????????????????????????????????????????????????1???0???????????0????????????????????00?10???0?00010????1???1?????????????????0??0??000?000?????????????????0??????????????11?????????????????????????????????????????????0?10010?00111000010100001100001??????01??????????????0100????????1?00???00??0?1?????0????0??
Nanshiungosaurus_brevispinus ????????????????????????????????????????????????????????????????????????????????????????????????????0001?00??0???0???????????????????????????????????????1?0???0???20020?0?0102?????????????????????????????????????????????????????2????????????????????????????????1?010????????????????????????????????????10011??????????????????????0???0??1???1???????????????0???000
Neimongosaurus_yangi ?????????????????????????????????????????????????????????????????21????0???????????0?000?1?1??10011?0101?0?0?1??2?01000210?1???????0001000000????????????1??21100??2???????????????00?00000????0??000000?20100?????0?1???0?0????11?121????0?????????????????0??????0111110000???010?1???????????????????????????????010000?00??0000????????0??001110100?????0?01????000?000
Segnosaurus_galbiensis ??????????????????????????????????????????????????????????????????2??10?0000?000???0100001???????????????????????0??????????????????0?10?1?00????????0???100211001?200210?0?1020?0????????00??0?00??0000?21?0??00????1??0?0????111012111????????????????????00?????01???????021?0?0??0????????????????????????1000100??0?010011???01???????001??11?01?0???????01?????0?0000
Erlikosaurus_andrewsi ?0110??02?1?1?0???010011100??10001?100000100011000?0??00100??11112200100000020001?00100001?????????????????????????????????????????????????0???????????????????????????????????????????????????????0?00?021????00??01??00?0?000111?1?11?0001001?001001000010000000001?????????????0????????????????????????????????????0?0?001100001??????????0??111100???1?????0100???0???
Therizinosaurus_cheloniformis ????????????????????????????????????????????????????????????????????????????????????????????????????????????????????????????????????001000?0?00??001000?0????????????????????????????????????????????????????????0???????0?0????11??????????????????????????????????????????02??0?00??0?011??000101?0???1?10??????????????????????????????????????11???0???0?10????????????
Patagonykus_puertai ??????????????????????????????????????????????????????????????????????????????????????????????????????111????????1??2????????????????0020??30210?110??110????????1??????0?????10?00?11?1?00???10011?0??0?????01??0???1???0??????010????????????????????????????????????1?1???????????00?0???????0?????00?1???????????11??1????0????????????????????1???????1?????????00????
Mononykus_olecranus ??????00???????112??????????????????????????????????????100????????????????????????2???0???????01?1?111010011????1??2??????1???1000?000200030210?1122?1100??1????1??000???????3??0?0110100111011211000020?00001??00???1??0?0????01??000??????0???????????????????????0?111??00?00000000?010001000?????00?1??????????111??1??00000000????0??00???001100?1???1?00?????010?000
Shuvuuia_deserti ?0110100000000?112010000?00??00?111??000010000101010010010???1?110001000000021000?021??000??0111111011101?0??1?201??2012000100?1000?00020?03021??1122011000?1?1011?2000?00021032?0??1101001110112110000201000?11000001100000010001?1??0?100110??0010010010110?00??0?0???????001?00000??0???001?000??0?000110???0????1??111?000?0010011000?00002?001100012111101?0?0?0100000
Protarchaeopteryx_robusta ?????????????????????0????????????????????????????????????????????0??000????????02022??0002????00?1???????????????01????10?????0???0???1?????00??10100000002?1???????2200?1?1????00?1???0???????????0???000?000???10??????0????00??1?101??0?0?????1?0?0????????????010?11?0000?001111000??010??10?01000100000000001011?1?1?000000??00000??0000100?000000011010?1???????0000
Elmisaurus_rarus ??????????????????????????????????????????????????????????????????????????????????????????????????????????????????????????????????????????????????0??01?1??????????????????????????????????????????100010??01????0??????????????????????????????????????????????????????????????????????0??????000010000?0??00??????????01?0?0000010??11??????1??0??00??0??1???1?????1?????
Caenagnathus_collinsi ?????????????????????????????????????????????????????????????????20110?00100?011????3??????????????????????????????????????????????????????????????????????????????????????????????????????????????????????????00??0??????0????0????????????????????????????1?10??????????????????????????????????????????????????????????????????????????????????????0????????????0???0???
Rinchenia_mongoliensis ?01?0????0??????????0111?1????1011?10013??00???000?0??????00??1?221120?01100??111?1?3??????1?????????1???1???1???0??????1?????????111?1??00000???1?0??00?10??1??0?????????????????????????0????0????0???????0??10??001????00???0?????????10101???01?01110?010?10?????????????????1????????????????????????????0??????1??????????????????????????0?????1???1?????11100?11???
Citipati_osmolskae ?011001001001??2210001111110001011?10013210001100000110011000110221120?0110010111?1?3??????1011001100101111001??20???002100111?011111?010000100?11000001110021100?110220?0??1010010?1101000000100?0000010000000100100110?000000000??0???01010110101001110101001??????10????010?0010110100101000000000000000100??????1??101?00000001011001000001??00000100?10?01?1110?0?1000
Ingenia_yanshini ?01?0????????????????11111100010?1?1??132??0?1???0?0??0011?????1221120?01100?0111?1?3??????????0??1??1???1???2???01????2100???0011111111?000000??10000010100211??11?022000011010?110110100000?100100000000000?1100?0?11??000?0?0000?0??101010110?01?01110?010?10??????????0010?001011010010100000010000000110000001011?101?00?????00100010000000000000101?10101101100011000
Khaan_mckennai   ?0110??????????????00111?110?01011?1001321000110?000??00110??????21120?01?00?0111??????????10110??1??1011110??????1??00210?111001??111110000?00?1100000111002110?1110220001?101??1??110100?0??10010000000000000100100110?000???000??0??1010101101010011101010?10?????001110010?001011010010100000000000000110000001011?1011000000000100010000000000000100?10101?0?101011000
Heyuannia_huangi ??11????????????????????????????????0?????????????0???????????????1120?011?0??1?????3??????1???????????????0?2???????????0?111?????11??10?00?10??1110?01010021???1??0220??011?1??1??1?010000?0?0????0000000?001??01??1????00???0????0??1????????????????????0?1??????00?110010?00?01?01000010000001?0?00?01???00000011?1?1?0?0001000???010?0?00?0000001?1??0?01?0????01?000
Sinovenator_changii ?0???1002?000011120000101?11100???1??????000011???011?10100??????000?001??????0000021??01??????1?111000110100001000110????1?????????010111?0??????????000???21??0111002000111011100?11110000???0010001001??000?????0?1??000011?0??0??001100?10?000??010?1?1100??0?00001111??00100???????????????0?????000000???2011011?101?1???0011??0??1000102?00??000??1?0??110???00??000
Mei_long         ?0?????????????????11010?????00?01?000022100001?10?010??100??????00010010??1?0000?021??01?0011011110010?1010?01???011012?111011????101?11?{01}0?0?1?10000000???2111?1???020??11101110?0111100?0101101?000{01}?11011?0?0000?0?00000???00???000110011???001?0100101?0???????011111?00010011110?0??000??10??000?00000?01?????1??1?11100?1?1??000011??1?210000000001?010110???0?00000
Byronosaurus_jaffei ?????101???101?1100110101011?00??????20220????????????1?100??????0000001??11????00021??01?0?0???????010110????????0??02??????????????????????????????????????????????????????????????1????0?0??0????????1??????????0????0????100???0?00?100?101100??0100???10?00110?????????????????????????????????????????????????????????????11????????????????????0??11?????0??????????
Sinornithoides_youngi ?0??0??????????????1?000??1???0????0020?2???????1?0??????????????00??0010???????000110101??????11?1001???????????0011?12102101??????01?11??0?00??10000000???????????0?200?????1?1???11110?????1????0001?11001?0??010????0000???00????30110011011??1?0100??1?000?1?0?011???0?00??01111010010100010000000000000???0???11?1111100011111000010????210000000001?010110???0?0?000
IGM100_44_unnamedtroodontid ??????012???????????????????????????????????????????1??0???????????????1??11???????1?0??????0????????????????????????????????????????????????????10000000????????????????????????????????????????????01?1?001???00??????0?0??1???????3?????????????????????1???0??????????????????????1?0101000?000????00000?????????????1???0?1111????0?????????0???0?????0?0??????????000
Troodon_formosus ???1?1112?1101000001???0?010100??????20220000210?00?1?01100????0?10??001??????????011010100???1111100101101111?1000?1020??11???????????????010????0??????????1????????????????1??0?011?100??????0100001210?01????0?0????0??01000???0?30??????0?1????????10?000???1?10??111?????????1?01?0???????????????????????????????11?101011110??????0?101??0??000??0?????10???01??000
Saurornithoides_mongoliensis ?01??1?1??1101???0?110001?10000????????2???????????????????1?010?100?0010??1????0001101010????????1???0??0?????100??1????0??????????????????????????????????????????002000?0101?10??11110??????????00??211?01??????0??1?0?????00??00?30?0001101100100000??1?0???1?010??1??0????????????????????????????????????0011??1???1??01011110????100??0???0????0??01?????000??10????
Saurornithoides_junior ?01101?12?110100?001?000??100?000????2022000?21??0????11100??????100?001???1????00011010100??????????????????1?1000?1020????????????????????????????????????????????????????????????????????????01?????????????????00??00???1100???0?30?1001101?001000001010000?110?0?????0??????????????????????????????????????????????1??????????????1?????????????0??01?1???0?0??1?????
Unenlagia        ??????????????????????????????????????????????????????????????????????????????????????????????????????1111?01????0???????0??????????0?0??1?01????????????01221110?111020101???1112011?01??0??????????????????0???????11???????????0?0??????????????????????????????????101??0??0?11????????????????????1?0????02???011????????????1?????1221????0?00??????????1?????????000
Buitreraptor_gonzalezorum ?0110???????????????00001011??00??????????100?10??0011?0?????????00??001??????????021??100?0010111100111?010???100011012?021???????01101111010?1?100?0??????11?101??122??1?111?110???11?0??0??1?011?011210000????????1??00?0????000????0???????1001001?0?01?0??????0?0?111?00?10011120????????????????????????0?101?1????1?0???0?2??????12011021??000?0??1??1?1?0??0?0000?0
Rahonavis_ostromi ????????????????????????????????????????????????????????????????????????????????????????????????????011111?0?1?11?011012?02?????????0????11??000?????????01121100111102?001?101??00111?10000??1??100011010000????????1?????0??????0?0??????????????????????????????????1111??3?0???130????????????????????????0211?011?101?01?10021?????11?11?1100??01??????1?11?????00?000
Bambiraptor_feinbergi ?0110?????0?0?1??1??00?0?01110000??10?01??10?1????0?01?0?????????00??010??1??0000?01011100?????0?120011??10??0???0011??110?????0011001011110?001?1010000010?21?001110020001?1021100?1?110000??10010001101?0?000?00?0?1??0000????000?0000000?1013001??100101?10?011100011011000?00111201011010001000001011001010201101101?100001001100?001200101100000100001011110???0000000
Sinornithosaurus_millenii ?011??????0??????????00???11100????10001?1100?1???0?01???????????00?00100??1????0101011100????????1??1???????0???00?1??1???????0111?01031110?00???0?0000010?211?0??10?2?0?111022?0????1???????1?01000112110?0?000?1001??0000???0??00?0001001101300?0?100101?1?00110?0??????00010011121?00101100001000111100001?211111??1?100001201?0000012??112?000001000110101?0????0??000
Microraptor_zhaoianus 1?1?????????????????00????????????????????????????????????????????0??010?0?1????0?0100000?????001?1??01?1000?01???0110?11?2111?01?100?1?1?10100?1101000011012110?011002?0?111022100?11111??00?1001?10112110??00??010?11?000????0??00?00?100?1?????????00??1?1?0???0??0?11110001001112110??0110000100011110010002111110?1?100001201110000020?11210000010001?0101?0???000?000
NGMC91_unnameddromaeosaurid ?011???????????????200????11??00?????001???0??????????????????????0000100??1??0?0?010??10??0??????????????????????01???1????1?????10??031?10?00??1?100001??????????????????????????????1???0????????????11????0???10????000????10????00010011013?01?1100??1?1?0?1?0?00?????0?0?001112110??011000?1000110100100??????1??1?1??001201110000??????21?0000100011010??0??????0000
IGM100_1015undescribeddromaeos ?011001001000012011200001010100001?100012110110001000??00001?0???00000100?11110001010101000????0??2?????????????????????????????????????????????????????????????????????????????????????????????????????????????0??00??00?0?0000???0?0??00010013?0001000001?1???0?0?0?????????????????????????????????????????????????????????????????????????????????0???1?????0??????????
Adasaurus_mongoliensis ??1100?????????????????????????0?????001???????????0????0???????????????0?????0?0?0????????01???0?2?01?1?????011000????1????????????0??1?1???????????????002211001110???0????021?0??1???00?????????001100?0010?????0?1??000???????0?000???????????0???????1????0?????01111??00?0??????????????????????????????02???011?1011000101110????12???01?00??01??????1???0????0?0000
Velociraptor_mongoliensis ?0110010010000120112000010111000011100012111?100010001000011101010000010011110000101011100001100012001111101111100011011102111001110011111101001110000001002211001110020001111211001111000000010010101101001000000?001100000000000000000000100130000100000101001010000110100001001111010010100010000000110010202001011?001100000111000001200101100000100001010110000?000000
Saurornitholestes_langstoni ?????????????????????????01110????????????111??????????????11????0???010?????00???010111000?11000120011111011011100?1011??11??????????01?1???????10??000100221?0?11?????????????????????????????????????????0???00?0????00?000?0???0000??????013?????0??00??10?1?1000011????00100?????1????????????????11001??0???????????????????1??00?1??010??0?????0??0?0?01?0???0??????
Deinonychus_antirrhopus ?0110????1???????11?0000?0111000011100012??????0?1????0?00?11010?000?0100111?1000?010111000?1100012001?111011????00110110?21?10???1?010111101001110000001002211001110020001110?01001111100000010010001101000000?00?001100000?0?000?0000??00?0013000?000????000?1?110001001??????0111101001010001000000011001020000101100011000101110000012?00001000001000010101100000000000
Achillobator_giganticus ?????????????????????????01110????????????????????????????????????????????????????000101??????0?01200?111100?????????011??1?????????0101?????????????00?010220?0111100100?011010?00?11110?0????00?000?101????0???????1???0????????0?000??????013?????????????????10??00000??00??0???1???????????0?????01?0????0000100100?1??????11??????1000000?0??????????0??1?????0???0??
Dromaeosaurus_albertensis ?0??001000000000010??0?0?0???0??01110????1111????10001?1001100???0000010011111000?000101000?????????????????????????????????????????????????????????????????????????????????????????????????????????????1??????00??????00?0?0000???0?00?000?00????0??00?0010010100000??????????????????????????????????????????????????????????0111???????????????????0??01?????000????0???
Utahraptor_ostrommaysi ?????????????????????0?0???????????00???????????????????????????????????????????01???101??0????00??1011111?0??????0?1011??????????????01????????????????????2?????11001??0???0??????1???000????00?0??????????????????????0????????0???????0?0????????????????????0?????000??????????????????????????????????????001?00??????????????????10???0???????????0??????????0??????
Atrociraptor_marshalli ??????????????????????????1110??????????????????????????????????????0?1????1????01000111?00?????????????????????????????????????????????????????????????????????????????????????????????????????????????????????????????0??????0???0?00??00?00?3??????0?????010?0110???????????????????????????????????????????????????????????????????????????????????????????????????????
Epidendrosaurus_ningchengensis ?0?????????????????????????????????10000?1?00???????????0????????2??00000?002000??????????????????????00?010?00???01?01011????1??????1011?10?00??10100000011?1???1??020?0?0?1?02?0??1?0100?0???0?????000010?000?0110?1??100????00?0?0??0??????????1??????01???10????00?1111????002102010??010001000000000000000????011?1?1?0110200001100???00011000000010?11101?0??1?000111
Epidexipteryx_ningchengensis ?0????????????????????????????00???000??00?0011????000????????????110?0?0????00001020??10000?????????0???0?0?1???102??123??100?1????0101?01000???????00??011?10?????020?0?011?02?0?????????0????01111??0?10??00???10??1?1?0?1??000???110??01?????????????01?1???0?1?00?111???0?0021120?????1?0????????000000??00???01??10110????????????10?000110?000?0??1?1??11???100?0111
Archaeopteryx_lithographica 101?0010??000??112011010??11100?011?00002100010?0000?0??100111?10000001000002?0000020??00000?1?1??100?0??010?0???0021012111000?????001011110000?11000000101121?0001?002000121011101?111100000?10010010?0010?0000001001100000?0?0000102001011101000100100101?0??00?0001?11110?3?0121130110?0100010001000010010202010011?1011011120010000010000121000000000110101?00000000000
Wellnhoferia_grandis ?0?????????????????110?0?????????????????????????????????????????00??010????????00020220020??????????????????0????02?00231??00??????01011110?0????0?0000001??1????1??0??0?1?1?11?01?1?0100?0????01001???010?000??010????00?0???1000?0200101?1???????0?00????0???0?0?0??11?1?0310?21130?10?0110010001000010010202???011?1?110111200?000001??001210000000001?0101???????0?000
Jeholornis_prima 10?????????????????1?????0??????????0??????0?????????????????????120?010??00200?1?1?2??0???0?????????????1???1????02???211?1????1?1?0103?110?00??1100000001221??0???10??0?????21?0?????1?000??1?01011??0010?000?0010????1000???00?0102?0?0?1????0?10?1???01?01?0????01?1111?031012113011??011000?110011000000002???01??1?1?01112000100101??0?111000000000?10101?0??1??00000
Sapeornis_chaoyangensis ?011???????????????11011?????00001?000002??0011???00?????????????000?010??00?00000??3??????0????????0?00?010?2???0??????21?1001????100011110?00??1120000?011?1??01??100?0?1?1021101???010000???0??1110000???000?0010?1???000???1010?0??0?0?1101?00100?0??01?0??0?????1?111?0031012113111?1011100?1110011100?1?02???011?1?110111????1??101?00?01?000000000110?0110??1?00?000
Confuciusornis_sanctus 10110??????????????11000?0???00001???0??2??0?01??0?0???01???????000010000?10?0001?1?3??????0???1??1????01110?2???0??????2??111?110100013111400011111000010112101????100?0012103210111??10??11?1121111010010?000000100110?000???001??0??0011?????00100000?01?0?10?????11111?0001012112111010100000101010110010002???011?1?1101112000101101??0011?000000000?10?01?0??100?2000
Protopteryx_fengningensis 10?????????????????110???????????????0????????????01?????????????000??1???????0?0??2???0??0?????????0?????1??2??????????2??111?11?11??031?10000??1120000001?????????????0?1?1??????????1???1????????1110010?0?0??0101????00?????0????2?01?111???00?10?00?01?0???????01?????1?3?012113111??011000?110010110001???????11?1?1?0111200?0??10??????1??00000000110?01?0????0??000
Yanornis_martini ?01????????????????111?0??????0??????0???????????0?1?0???????????000?011??00????00020??0000????11??????????0?2?????????????111?1???0?0031?10?00??1120?00?????????????00???121?32?01???0100?1??11??112?00010?000??010????00?????101?1?200001?1???00110?00??1?00?00?0001111??1???012113111??0110?0011?0?1111101??????01??1?1101??20000???0??????1??00000000110?0??0??10???000
Hagryphus_giganteus ?????????????????????????????????????????????????????????????????????????????????????????????????????????????????????????????????????????????????10000001????????????????????????????????????????????????????????0????????????????????????????????????????????????????????????????????0?0111000000010001?00100??????????????????????0?11????????????????0??0?0?????????????
Alvarezsaurus_calvoi ??????????????????????????????????????????????????????????????????????????????????????????????1???100??????????2?1??2?12????????????0?0?0?????????????1???00111?0??2????????????????1?00???0?01??10000000???0????????1???0??????????0????????????????????????????????111110??0?????????????????????????0?1????0??????????1?????000?0???????0??1000???0?????11??1????000????
Microvenator_celer ?????????????????????????????????????????????????????????????????21?10?0????????????????????011?0?11000111100???0???1002?????????????1000??01000??????0??1002???0111????0?????10110?0101100?0010010???????0??0???0???11??0?0????00??0???????????????????????00???????0?111??????011110??0???????????????0?0???0????011?????????????????????0????00000?1????0????????0??1???
Avimimus_portentosus ?01?0???10001?00??0??1?1????????1???1?????00?11??0?00100110??????2?1???00?0??0110???3???????011011110101?0?00??100???????????????????11?000100???110?????00?211?01??0?2000???010100001100?0???10011110020???00??0???01?0??00000?00??0?????0???????1?????1011???0?????001?????????111??1??????0?????????????????00??011?101?0???00000????1000002?0000?0?????????10??011?0000
Caudipteryx      00110??????????????0?110?010000011?00013210001?00?00?????????????21010?00?????10031?3?????00????0?100????????0???01????210?111000??001010001?00??1000000010020???11?02200?111?10?10?11?01??0????01000002000000000010?110?000???0?00?0??10001001000110100111?0010?????001110?10?0001110100?01000000010?0001101?00001011?1011000000000???010000010000000000110101?0??00001000
Oviraptor_philoceratops ?0110??????????1??00?????111?0?011???0132??0?1?0???0?100?????1????1120?01100?01?1?1?3??????0??1???1??????1?0?????????????????1?????11?1?0?000001?110?0001???21?00????????????????????????????????????????????00100100?????00?0000???????01?1?010??1??1?00?010?10?????0?111?010?00?11?01??101000000000000000100??????????????????????1000??????????00??100?10?01?0?10???1?00
Conchoraptor_gracilis ?0110??????????1???00111?1100?1011?1001321000110?000?????1?0????221120?010?0?0111?1?3???????????????010??1?012?110??1???0?0111???1?11?11000010????????011?00210001?102???0???01001??11010?0????0??000000??0?0???00??0110??0?000000??0???0101011?101001110101???????????????0?????1?1????010?0???0?00?0000111000??????1???110???????0?0001000000?????0???0?10?0??0110101?000
Chirostenotes_pergracilis ????????01?01101??0???1?11??0?????????????????????????01110????0??????????????????1???????????????1101?11????1?12????????????????????101?????????????000110021?0001?0220001110?00?0?????0?????10?100?00100000????0???1???0?0?00????????????????????????????1?????????1?1????????0??????00??????000010?0?1001000?001?1??101?000000010001110000?1?000000??0??0????????001????
Incisivosaurus_gauthieri ?0110???1??01?????1000101010001001?0?010??00011000?01010110101111200100001001?1?02022??0002????????????????????????????????????????????????????????????????????????????????????????????????????????????????????00??00??00?0??000???0010?00010?10?010010010110010??001?????????????????????????????????????????????????????????????????????????????????0??11?????0110???0???
IGM100_42_unnamedoviraptorid ?0110??????????????001111110?01011?100132100?11??000???01100?111221120?01100??111?1?3??????10??0??1??1?1?1???1???01??00?10?1???01?1111110000?0???100000011002110?1110220??1?1010?1??1?01000????????000010000000100?001?0??00?0?0?00?0??101010110101001110101??10?????001010010?001011?100?010001?000000000010000001011?10110???00000110010?00010001000100?10101111101011???
Anchiornis_huxleyi 001100?????????????11010??111?00?????0?2?000??1????1?1???????????000??01??1?????00020??01??0?101???00?0??010?01???01101210??011????011131110000??1000000010?21?1001102200?1?112112???1?1?000??1?01?000121100010?1000?1??00?0???0????030110?1101000100100?01?0???0?0?011111101?0001112011010100010101001110010102001011?1011000?20?1100001000?121000?00000110101?0??00000000
Linhevenator_tani ?0????????????????1?????1?????000???02?2??0002101?????0100??1???????????????????0?011010??0?????????01???1?0??????????????????????????0??0001????????????????????????02????11?????????????0?????????0??211011??????????00??????????0?3?01???????001001?010?1???1???????0???????1?01?????????????????????????????000????101?0110111?0????10??1?1??00001?????????0????1??????
Talos_sampsoni    ??????????????????????????????????????????????????????????????????????????????????????????????????????0011???????????????????????????????????0??????????????????????002??0??00??1?1?????????10??01??0012110010?????????????????????????????????????????????????????????001?????????1???????????????????????????20?1?????11?000001110????11??102??0??00?????????1?????1????0
Philovenator      ????????????????????????????????????????????????????????????????????????????????????????????????????????????????????????????????????????????????????????????????????????????????????111100?1??1?01110?1211001???????????????????????????????????????????????????????????????????????????????????????????????????????1101111101011110??????????2??0??01?????????0?????1?????
;
end;
